# Supplementary material for: Simple vs. Complex Carbohydrate Dietary Patterns and the Global Overweight and Obesity Pandemic
Source: Int J Environ Res Public Health. 2017 Oct 4;14(10):1174. doi: 10.3390/ijerph14101174 (PMC5664675; doi:10.3390/ijerph14101174)
Supplement: Supplementary file 1 [file ijerph-14-01174-s001.xls]

## Sheet: Table S1
Table S1. Source and short description of each variables.
Variable	Description	Year	Suorce	References
HDI	Human Development Index	2015	UNPD (2016)	[28]
y	Gross National Income (GNI) per capita	2015	UNPD (2016)	[28]
	2011, PPP $
HOW	Prevalence of overweight (population aged 18+)	2014	WHO (2014)	[3]
	Age-standardized rate, both sex
HOB	Prevalence of obesity (population aged 18+)	2014	WHO (2014)	[3]
	Age-standardized rate, both sex
XC	Cereals	2014	FAO (2014)	[27]
	Share of dietary energy supply (% DES)
XS	Sugar and sweeteners	2014	FAO (2014)	[27]
	Share of dietary energy supply (% DES)
DPI OW	Dietary patter Index (DPI): Overweight	2014	Authors' calculations	-
DPI OB	Dietary patter Index (DPI): Obesity	2014	Authors' calculations	-
EHY OW	Elasticity of overweight (HOW)	2014-2015	Authors' calculations	-
	with respect to income per capita (y)
EHD OW	Elasticity of overweight (HOW)	2014-2015	Authors' calculations	-
	with respect to income the Dietary Pattern Index (DPI)
EDY OW	Elasticity of Dietary Pattern Index	2014-2015	Authors' calculations	-
	(DPI overweight) with respect to income per capita (y)
EHY OB	Elasticity of obesity (HOB)	2014-2015	Authors' calculations	-
	with respect to income per capita (y)
EHD OB	Elasticity of obesity (HOB)	2014-2015	Authors' calculations	-
	with respect to income the Dietary Pattern Index (DPI)
EDY OB	Elasticity of Dietary Pattern Index	2014-2015	Authors' calculations	-
	(DPI, Obesity) with respect to income per capita (y)

## Sheet: Table S2
Table S2. Summary statistics
Variable	Description	Mean	Median	Max	Min	Std. Dev.	n
HDI	Human Development Index	0.696581	0.727287	0.949423	0.35244	0.154754	185
Y	Gross National Income (GNI) per capita	16867.1	10382.7	129916	587.474	18521.1	185
	2011, PPP $
HOW	Prevalence of overweight (population aged 18+)	47.6859	54.8	79.3	14.5	16.9963	185
	Age-standardized rate, both sex
HOB	Prevalence of obesity (population aged 18+)	18.9903	20.1	47.6	2.2	10.1753	185
	Age-standardized rate, both sex
XC	Cereals	41.7891	40.6085	98.1	16.6	13.564	185
	Share of dietary energy supply (% DES)
XS	Sugar and sweeteners	9.65906	10.0478	21.8	1.1	4.29295	185
	Share of dietary energy supply (% DES)
DPI OW	Dietary patter Index (DPI): Overweight	39.1439	36.6965	117.738	2.9759	24.0428	185
DPI OB	Dietary patter Index (DPI): Obesity	37.6754	35.3199	113.321	2.86426	23.1408	185
EHY OW	Elasticity of overweight (HOW)	0.118134	0.108821	0.349942	-0.103309	0.0998875	185
	with respect to income per capita (y)
EHD OW	Elasticity of overweight (HOW)	0.26552					185
	with respect to income the Dietary Pattern Index (DPI)
EDY OW	Elasticity of Dietary Pattern Index	0.444914	0.409841	1.31795	-0.389082	0.376196	185
	(DPI overweight) with respect to income per capita (y)
EHY OB	Elasticity of obesity (HOB)	0.146583	0.130908	0.536754	-0.226141	0.168127	185
	with respect to income per capita (y)
EHD OB	Elasticity of obesity (HOB)	0.471421					185
	with respect to income the Dietary Pattern Index (DPI)
EDY OB	Elasticity of Dietary Pattern Index	0.310938	0.277688	1.13859	-0.4797	0.356638	185
	(DPI, Obesity) with respect to income per capita (y)

## Sheet: Table S3
Table S3. Database
HDI RANK	COUNTRY	HDI	GNIPC	HOW	HOB	XC	XS		DPI OW	DPI OB		EHY OW	EHD OW	EDY OW	EHY OB	EHD OB	EDY OB
L	Afghanistan	0.479375	1870.83	16.2	2.9	75.2	2.8		5.43498	5.23109		0.252698	0.26552	0.95171	0.373076	0.471421	0.791387
H	Albania	0.764174	10252.5	52.7	17.6	38.4	7.1		26.9889	25.9764		0.109881	0.26552	0.413833	0.132692	0.471421	0.281472
H	Algeria	0.744806	13533	59.1	24.8	55.2	9.3		24.5925	23.6699		0.0865744	0.26552	0.326056	0.0934635	0.471421	0.198259
VH	Andorra	0.858452	47979.5	66.9	29.5	33.8725	12.2657		52.8572	50.8743		-0.0196816	0.26552	-0.0741246	-0.0853823	0.471421	-0.181117
L	Angola	0.533464	6290.9	30.9	10.2	29.3	5.6		27.8983	26.8517		0.150885	0.26552	0.568263	0.201709	0.471421	0.427874
H	Antigua and Barbuda	0.785589	20907.2	61.9	30.9	37.436	11.0924		43.2508	41.6282		0.0500572	0.26552	0.188525	0.0319993	0.471421	0.0678783
VH	Argentina	0.827401	20945.1	61.7	26.3	33.3	14.7		64.4364	62.0191		0.0499052	0.26552	0.187953	0.0317433	0.471421	0.0673354
H	Armenia	0.74285	8189.12	55.5	19.5	43.8	11		36.6587	35.2834		0.128746	0.26552	0.484884	0.164446	0.471421	0.34883
VH	Australia	0.93868	42822.2	64	28.6	22.6	12.2		78.7969	75.8409		-0.0101346	0.26552	-0.0381689	-0.0693132	0.471421	-0.14703
VH	Austria	0.893405	43608.8	53.1	18.4	24.5	12.2		72.6862	69.9594		-0.0116628	0.26552	-0.0439245	-0.0718855	0.471421	-0.152487
H	Azerbaijan	0.758528	16413.3	58.1	22.5	58.4	5.4		13.4971	12.9907		0.0703745	0.26552	0.265044	0.0661965	0.471421	0.140419
H	Bahamas	0.791623	21565.1	69	36.2	37.1409	11.1896		43.9763	42.3265		0.0474564	0.26552	0.17873	0.0276216	0.471421	0.0585922
VH	Bahrain	0.823884	37236.4	71.7	35.1	35.5631	11.7091		48.0597	46.2567		0.0015997	0.26552	0.00602479	-0.0495625	0.471421	-0.105134
M	Bangladesh	0.578824	3341.49	18.1	3.6	80	3.3		6.02118	5.7953		0.204002	0.26552	0.76831	0.291113	0.471421	0.617521
H	Barbados	0.794719	14951.6	62.3	31.3	26.7	18.6		101.686	97.8709		0.0782049	0.26552	0.294535	0.0793763	0.471421	0.168377
H	Belarus	0.795827	15629.4	58	23.4	27.3	10.1		54.0029	51.9769		0.0744826	0.26552	0.280516	0.0731111	0.471421	0.155087
VH	Belgium	0.895514	41243.3	56.9	20.2	22.3	13.7		89.6755	86.3113		-0.00698067	0.26552	-0.0262906	-0.0640046	0.471421	-0.13577
H	Belize	0.706195	7374.81	53.8	22.5	38	15.1		58.0031	55.8271		0.137539	0.26552	0.518	0.179246	0.471421	0.380224
L	Benin	0.485096	1979.25	28.9	9.3	42.9	1.4		4.76353	4.58483		0.247968	0.26552	0.933897	0.365115	0.471421	0.7745
M	Bhutan	0.606534	7081.45	27.1	6.7	46.1931	8.20899		25.9401	24.9669		0.140947	0.26552	0.530834	0.184981	0.471421	0.392391
M	Bolivia (Plurinational State of)	0.674074	6154.89	52.1	17.1	44.8	11.9		38.7728	37.3182		0.15272	0.26552	0.575174	0.204797	0.471421	0.434426
H	Bosnia and Herzegovina	0.749834	10090.8	51.8	17.9	45.9	5.4		17.1727	16.5285		0.111215	0.26552	0.418859	0.134938	0.471421	0.286237
M	Botswana	0.697687	14662.8	48	22.4	44.7	13.2		43.1047	41.4876		0.0798424	0.26552	0.300702	0.0821324	0.471421	0.174223
H	Brazil	0.754144	14145.1	54.1	20	30.7	13.1		62.2861	59.9494		0.08286	0.26552	0.312067	0.0872116	0.471421	0.184997
VH	Brunei Darussalam	0.864937	72843.5	47	18.1	44.2	13.4		44.2528	42.5926		-0.0547357	0.26552	-0.206145	-0.144384	0.471421	-0.306274
H	Bulgaria	0.793642	16261.3	59.1	23.2	38.2	11.2		42.7969	41.1914		0.0711556	0.26552	0.267986	0.0675112	0.471421	0.143208
L	Burkina Faso	0.40174	1537.5	23.6	6.3	64	2.1		4.78958	4.6099		0.269172	0.26552	1.01375	0.400804	0.471421	0.850204
L	Burundi	0.403765	691.183	15.5	2.6	56.1098	4.94375		12.861	12.3785		0.336294	0.26552	1.26655	0.513781	0.471421	1.08986
M	Cabo Verde	0.648317	6049.13	36.9	13	42	8.1		28.151	27.0949		0.154175	0.26552	0.580654	0.207247	0.471421	0.439621
M	Cambodia	0.563082	3095.32	17.6	3.2	68.5	7.4		15.7688	15.1773		0.210426	0.26552	0.792507	0.301926	0.471421	0.64046
L	Cameroon	0.517547	2894.28	33.5	11.4	37.3	3.6		14.0881	13.5596		0.216064	0.26552	0.813741	0.311416	0.471421	0.66059
VH	Canada	0.920284	42581.9	64.4	28	24.3	12		72.083	69.3788		-0.00966221	0.26552	-0.0363898	-0.0685181	0.471421	-0.145344
L	Central African Republic	0.35244	587.474	21.6	5.1	24.6	3.8		22.5479	21.702		0.349942	0.26552	1.31795	0.536754	0.471421	1.13859
L	Chad	0.396073	1990.87	25.8	8.1	52	4		11.2283	10.8071		0.247477	0.26552	0.932046	0.364288	0.471421	0.772745
VH	Chile	0.846626	21665.5	63.1	27.8	40.6	14.8		53.21	51.2139		0.0470664	0.26552	0.177261	0.0269652	0.471421	0.0571998
H	China	0.737681	13345.5	34.4	6.9	48.9	2.3		6.86558	6.60801		0.0877456	0.26552	0.330467	0.0954348	0.471421	0.202441
H	Colombia	0.727287	12762.2	56.5	21	30.8	13.6		64.4534	62.0355		0.0914975	0.26552	0.344597	0.10175	0.471421	0.215836
L	Comoros	0.497496	1335	24.6	6.6	51.5258	6.45313		18.2812	17.5954		0.281028	0.26552	1.05841	0.42076	0.471421	0.892536
M	Congo	0.592284	5502.56	33.6	11	23.3	6.6		41.3472	39.7961		0.162126	0.26552	0.610597	0.220629	0.471421	0.468008
L	Congo (Democratic Republic of the)	0.435465	679.631	20.6	4.4	54.5595	5.45421		14.5922	14.0447		0.337709	0.26552	1.27188	0.516163	0.471421	1.09491
H	Costa Rica	0.776453	14006.4	60.4	24.3	31.6	19.2		88.6895	85.3623		0.0836878	0.26552	0.315185	0.0886049	0.471421	0.187953
L	Côte d'Ivoire	0.473679	3162.74	30.6	9.2	33.8	3.6		15.5469	14.9637		0.208617	0.26552	0.785694	0.298881	0.471421	0.634001
VH	Croatia	0.827403	20291.3	58.8	23.3	29.5	14.8		73.2315	70.4842		0.0525675	0.26552	0.197979	0.0362244	0.471421	0.0768408
H	Cuba	0.774669	7455.06	58.6	25.2	36.2	17.7		71.3711	68.6937		0.136631	0.26552	0.514578	0.177716	0.471421	0.37698
VH	Cyprus	0.855646	29458.5	60.3	23.8	25.9	10.8		60.867	58.5836		0.0212703	0.26552	0.0801082	-0.0164537	0.471421	-0.0349023
VH	Czech Republic	0.877842	28144	63.4	26.8	26.8	10.7		58.2783	56.092		0.0251028	0.26552	0.0945421	-0.010003	0.471421	-0.0212188
VH	Denmark	0.924649	44518.9	55.2	19.3	25.4	14.7		84.4776	81.3084		-0.0133969	0.26552	-0.0504553	-0.0748041	0.471421	-0.158678
L	Djibouti	0.473134	3216.18	31.9	9.6	55.2	11.9		31.4678	30.2873		0.207211	0.26552	0.780396	0.296514	0.471421	0.628979
H	Dominica	0.726398	10095.8	58.4	25.8	40.3308	10.1392		36.6965	35.3199		0.111173	0.26552	0.4187	0.134867	0.471421	0.286087
H	Dominican Republic	0.721686	12756.4	56.3	23.9	29.2	13.8		68.9849	66.397		0.0915356	0.26552	0.344741	0.101814	0.471421	0.215973
H	Ecuador	0.739299	10536.2	54.1	18.7	31.8	7.6		34.8855	33.5767		0.107589	0.26552	0.405203	0.128835	0.471421	0.273291
M	Egypt	0.691392	10064.1	62	28.9	63.5	8.1		18.6196	17.921		0.111438	0.26552	0.419697	0.135313	0.471421	0.287032
M	El Salvador	0.679777	7732.03	56.7	21.8	46.9	15.5		48.2411	46.4313		0.133568	0.26552	0.503044	0.172562	0.471421	0.366046
M	Equatorial Guinea	0.592436	21517.2	41.7	17.5	46.8825	7.98198		24.8518	23.9195		0.0476428	0.26552	0.179432	0.0279354	0.471421	0.0592579
L	Eritrea	0.420153	1489.85	19	4.1	55.3084	5.20765		13.7439	13.2283		0.271815	0.26552	1.02371	0.405253	0.471421	0.859641
VH	Estonia	0.865118	26361.9	56.7	22.6	27.3	15.6		83.4103	80.2812		0.0305946	0.26552	0.115225	-0.000759492	0.471421	-0.00161107
L	Ethiopia	0.44775	1522.95	18.9	4	65.1	2.7		6.05398	5.82686		0.26997	0.26552	1.01676	0.402147	0.471421	0.853054
H	Fiji	0.736406	8244.76	71.2	36.4	39.4	10.5		38.9001	37.4408		0.128178	0.26552	0.482743	0.163489	0.471421	0.3468
VH	Finland	0.894517	38868.1	55.2	20.6	28.5	9.2		47.1195	45.3518		-0.002001	0.26552	-0.00753616	-0.0556231	0.471421	-0.11799
VH	France	0.897436	38085.4	60.7	23.9	26.7	10.3		56.3098	54.1973		-0.00029306	0.26552	-0.00110372	-0.0527483	0.471421	-0.111892
M	Gabon	0.697124	19043.6	44.8	17.6	33.4	5.9		25.7848	24.8175		0.0578955	0.26552	0.218046	0.0451923	0.471421	0.0958641
L	Gambia	0.451575	1540.83	32.5	10.9	53.9	11.5		31.1435	29.9751		0.26899	0.26552	1.01307	0.400499	0.471421	0.849556
H	Georgia	0.769397	8855.83	55.2	20.8	52.2	14.4		40.2671	38.7565		0.122175	0.26552	0.460136	0.153385	0.471421	0.325368
VH	Germany	0.925669	44999.6	54.8	20.1	24.8	13.4		78.8699	75.9111		-0.0142986	0.26552	-0.0538512	-0.0763218	0.471421	-0.161897
M	Ghana	0.578829	3838.67	33.6	12.2	26.3	3.9		21.6455	20.8334		0.192357	0.26552	0.724452	0.271512	0.471421	0.575943
VH	Greece	0.865873	24807.5	60.5	22.9	26.7	7.7		42.0957	40.5165		0.0356966	0.26552	0.13444	0.00782809	0.471421	0.0166053
H	Grenada	0.753556	11502.2	57.5	26.2	39.0026	10.5765		39.5829	38.098		0.100225	0.26552	0.377465	0.116439	0.471421	0.246996
M	Guatemala	0.63957	7063.2	52	18.6	45.9	20.6		65.5107	63.0531		0.141164	0.26552	0.53165	0.185346	0.471421	0.393165
L	Guinea	0.414186	1058.22	25.5	6.8	49.6	5.3		15.5974	15.0123		0.300535	0.26552	1.13187	0.453593	0.471421	0.962181
L	Guinea-Bissau	0.42384	1369.46	26.1	7.2	56	5		13.0329	12.5439		0.278889	0.26552	1.05035	0.417159	0.471421	0.884898
M	Guyana	0.638016	6884.45	52.9	22.9	46.3	13.1		41.2998	39.7505		0.143316	0.26552	0.539755	0.188968	0.471421	0.400848
L	Haiti	0.492813	1656.94	38.5	11.9	45	10.6		34.3836	33.0937		0.262891	0.26552	0.990098	0.390232	0.471421	0.827778
M	Honduras	0.624732	4466.34	51.5	18.2	46.4	16.1		50.6484	48.7484		0.179642	0.26552	0.676568	0.250112	0.471421	0.530548
VH	Hungary	0.836211	23394.3	56.9	24	27	10.7		57.8466	55.6765		0.0406209	0.26552	0.152986	0.0161164	0.471421	0.0341868
VH	Iceland	0.92111	37065.2	57.9	22.8	19.8	13.1		96.5749	92.9519		0.00198647	0.26552	0.00748142	-0.0489115	0.471421	-0.103753
M	India	0.623559	5663.47	22	4.9	58	8.9		22.3986	21.5583		0.159706	0.26552	0.601484	0.216556	0.471421	0.459368
M	Indonesia	0.688847	10053.3	24.5	5.7	63.6	5.3		12.164	11.7077		0.111527	0.26552	0.420034	0.135464	0.471421	0.287351
H	Iran (Islamic Republic of)	0.774063	16395.2	62.3	26.1	50.2	8.9		25.8788	24.908		0.070467	0.26552	0.265393	0.0663522	0.471421	0.140749
M	Iraq	0.649457	11607.7	57.9	23.8	61.6	8.9		21.0895	20.2984		0.0994577	0.26552	0.374577	0.115148	0.471421	0.244258
VH	Ireland	0.922746	43798	60.3	25.6	27.1	10.2		54.94	52.879		-0.0120262	0.26552	-0.0452929	-0.072497	0.471421	-0.153784
VH	Israel	0.898886	31214.7	63.5	25.3	32.5	6.8		30.541	29.3953		0.0164089	0.26552	0.061799	-0.0246363	0.471421	-0.0522597
VH	Italy	0.886552	33573	58.8	21	31.4	8.1		37.6542	36.2416		0.0102943	0.26552	0.0387704	-0.0349281	0.471421	-0.074091
H	Jamaica	0.730041	8350.02	59.1	27.2	33.2	17		74.7427	71.9387		0.127113	0.26552	0.478731	0.161696	0.471421	0.342997
VH	Japan	0.903462	37268	24.2	3.3	38.3	9.9		37.7307	36.3152		0.00152848	0.26552	0.00575657	-0.0496824	0.471421	-0.105389
H	Jordan	0.741499	10111.3	58.8	30.5	46.1	15.5		49.0782	47.2371		0.111045	0.26552	0.418215	0.134651	0.471421	0.285627
H	Kazakhstan	0.794123	22093.1	26.2	23.4	31.9	8.9		40.7246	39.1969		0.0454255	0.26552	0.171081	0.0242032	0.471421	0.051341
M	Kenya	0.554679	2880.74	26.2	7	45.6	7.8		24.9682	24.0316		0.216458	0.26552	0.815223	0.312078	0.471421	0.661995
M	Kiribati	0.588126	2475.2	73.1	40.6	30.7	16.3		77.501	74.5935		0.229196	0.26552	0.863196	0.333518	0.471421	0.707474
VH	Korea (Republic of)	0.900992	34540.6	33.5	5.8	43.2	10.6		35.8162	34.4726		0.00790875	0.26552	0.0297859	-0.0389434	0.471421	-0.0826085
VH	Kuwait	0.800183	76075.2	75.4	39.7	40.3	10.6		38.3936	36.9533		-0.0583801	0.26552	-0.219871	-0.150518	0.471421	-0.319286
M	Kyrgyzstan	0.663631	3096.8	47.2	14.4	47.7	8.2		25.093	24.1517		0.210386	0.26552	0.792356	0.301859	0.471421	0.640317
M	Lao People's Democratic Republic	0.586045	5048.56	19	3.5	68.5	2.3		4.90112	4.71725		0.169355	0.26552	0.637825	0.232797	0.471421	0.493819
VH	Latvia	0.829862	22589.2	57.9	23.7	27.3	9.4		50.2601	48.3746		0.0435612	0.26552	0.16406	0.0210654	0.471421	0.0446848
H	Lebanon	0.762841	13311.6	68.7	31.9	34	13.3		57.0993	54.9572		0.0879591	0.26552	0.331271	0.0957942	0.471421	0.203203
L	Lesotho	0.497368	3318.77	35.4	14.2	77.1	6.5		12.306	11.8443		0.204574	0.26552	0.770467	0.292076	0.471421	0.619566
L	Liberia	0.426899	682.59	25	6.6	47.5	3.1		9.52634	9.16896		0.337344	0.26552	1.2705	0.515549	0.471421	1.09361
H	Libya	0.716443	14303.1	68.7	33.1	40.8177	9.9789		35.6855	34.3468		0.0819276	0.26552	0.308555	0.0856422	0.471421	0.181668
VH	Lithuania	0.848099	26006.5	60.1	25.9	33.9	10.8		46.5031	44.7586		0.0317342	0.26552	0.119517	0.00115861	0.471421	0.0024577
VH	Luxembourg	0.898465	62470.6	58	23.1	21	7.8		54.2167	52.1828		-0.0418389	0.26552	-0.157574	-0.122677	0.471421	-0.260227
L	Madagascar	0.512149	1319.7	22.8	5.4	60.3	3.2		7.74623	7.45564		0.281996	0.26552	1.06205	0.42239	0.471421	0.895992
L	Malawi	0.475935	1073.29	21.9	5.3	55.6	4.6		12.0765	11.6235		0.299347	0.26552	1.1274	0.451594	0.471421	0.957943
H	Malaysia	0.78945	24619.7	38.5	13.3	45.9	13.1		41.6597	40.0969		0.0363349	0.26552	0.136844	0.00890237	0.471421	0.0188841
H	Maldives	0.701027	10382.7	29.6	7.9	39.5	13.2		48.7792	46.9493		0.108821	0.26552	0.409841	0.130908	0.471421	0.277688
L	Mali	0.442109	2218.36	25.1	6.8	64	4.3		9.80723	9.43932		0.238393	0.26552	0.897836	0.348999	0.471421	0.740313
VH	Malta	0.855851	29499.6	64	26.6	32.6	16.4		73.4318	70.677		0.0211535	0.26552	0.0796681	-0.0166504	0.471421	-0.0353196
L	Mauritania	0.513106	3527.26	30.3	9.7	51.2	12		34.2113	32.9278		0.199459	0.26552	0.751203	0.283467	0.471421	0.601303
H	Mauritius	0.781386	17948	45.1	17.9	45.7	12.4		39.6062	38.1204		0.0628701	0.26552	0.236781	0.0535654	0.471421	0.113625
H	Mexico	0.761683	16383.1	64.4	28.1	42.7	15.6		53.3279	51.3273		0.0705289	0.26552	0.265625	0.0664563	0.471421	0.14097
M	Micronesia (Federated States of)	0.637783	3291.48	68.9	37.2	44.6647	8.71222		28.4723	27.4041		0.205268	0.26552	0.773078	0.293243	0.471421	0.622042
M	Moldova (Republic of)	0.699041	5026.26	46.6	14.9	44.3	10.7		35.2564	33.9338		0.169727	0.26552	0.639224	0.233422	0.471421	0.495146
H	Mongolia	0.734832	10449.2	50.4	16.7	43.3	5.6		18.8781	18.1699		0.108285	0.26552	0.407823	0.130006	0.471421	0.275775
VH	Montenegro	0.807224	15409.6	55.8	20	33.1	8.4		37.0433	35.6536		0.0756719	0.26552	0.284995	0.0751128	0.471421	0.159333
M	Morocco	0.647402	7194.92	56.5	22.3	60.8	11.1		26.6488	25.6491		0.139613	0.26552	0.525808	0.182735	0.471421	0.387627
L	Mozambique	0.41759	1098.44	21.8	5.3	41.2	5		17.7146	17.05		0.297403	0.26552	1.12008	0.448322	0.471421	0.951001
M	Myanmar	0.555566	4943.13	17.6	2.9	53.1	7.1		19.5174	18.7852		0.171127	0.26552	0.644497	0.235779	0.471421	0.500145
M	Namibia	0.640007	9769.85	42.9	18.9	44.4	9.6		31.5607	30.3767		0.113929	0.26552	0.429078	0.139505	0.471421	0.295925
M	Nepal	0.558162	2337.07	18	3.3	98.1	2		2.9759	2.86426		0.234017	0.26552	0.881353	0.341633	0.471421	0.724687
VH	Netherlands	0.924312	46325.6	55.9	19.8	19.7	13.7		101.511	97.7027		-0.0167366	0.26552	-0.0630331	-0.0804254	0.471421	-0.170602
VH	New Zealand	0.9149	32870.1	64	29.2	25.1	18.1		105.26	101.311		0.0120707	0.26552	0.0454606	-0.0319381	0.471421	-0.0677487
M	Nicaragua	0.645203	4746.7	49.4	17.1	50.4	15.2		44.0221	42.3706		0.174531	0.26552	0.657318	0.241509	0.471421	0.5123
L	Niger	0.352641	889.456	19.4	4.3	60.8	2.2		5.28174	5.0836		0.31512	0.26552	1.1868	0.478143	0.471421	1.01426
L	Nigeria	0.527105	5442.9	33.3	11	43.6	3.6		12.0524	11.6003		0.163041	0.26552	0.614044	0.222169	0.471421	0.471275
VH	Norway	0.949423	67614.4	58.5	23.1	28.4	9.9		50.8832	48.9744		-0.0484818	0.26552	-0.182592	-0.133858	0.471421	-0.283945
H	Oman	0.795779	34402.3	67.4	30.9	36.9376	11.2565		44.4827	42.814		0.00824576	0.26552	0.0310551	-0.0383761	0.471421	-0.0814052
M	Pakistan	0.550354	5031.17	23	5.4	47.4	12.2		37.5698	36.1604		0.169645	0.26552	0.638915	0.233284	0.471421	0.494853
H	Palau	0.787785	13770.8	79.3	47.6	37.3286	11.1278		43.5135	41.8811		0.0851116	0.26552	0.320547	0.0910013	0.471421	0.193036
H	Panama	0.787656	19470.2	62.2	26.8	43	11.9		40.3958	38.8804		0.0560355	0.26552	0.211041	0.0420617	0.471421	0.0892232
L	Papua New Guinea	0.516168	2711.77	60.7	27.9	50.6125	6.75381		19.4782	18.7475		0.221533	0.26552	0.834336	0.32062	0.471421	0.680114
M	Paraguay	0.692966	8181.69	48.5	16.3	31.5	9.7		44.9489	43.2627		0.128822	0.26552	0.48517	0.164574	0.471421	0.349101
H	Peru	0.739749	11294.8	58.2	21.1	44.4	8.9		29.2594	28.1617		0.101752	0.26552	0.383217	0.119009	0.471421	0.252448
M	Philippines	0.681799	8395.09	23.6	5.1	56.8	9.3		23.8997	23.0031		0.126661	0.26552	0.477029	0.160935	0.471421	0.341383
VH	Poland	0.855229	24117	61.1	25.2	34.8	12.6		52.8505	50.8678		0.0380667	0.26552	0.143367	0.0118173	0.471421	0.0250675
VH	Portugal	0.842658	26103.6	55.6	20.1	28.8	7.4		37.5057	36.0987		0.0314211	0.26552	0.118338	0.000631714	0.471421	0.00134002
VH	Qatar	0.855531	129916	78.1	42.3	34.0153	12.2187		52.4334	50.4663		-0.103309	0.26552	-0.389082	-0.226141	0.471421	-0.4797
VH	Romania	0.802382	19427.6	57.6	21.7	38.3	7.9		30.1083	28.9788		0.0562194	0.26552	0.211733	0.0423712	0.471421	0.0898796
VH	Russian Federation	0.803908	23286.1	58.7	24.1	36.4	13.9		55.7406	53.6495		0.0410102	0.26552	0.154453	0.0167717	0.471421	0.0355769
L	Rwanda	0.497577	1616.86	19.8	4	16.6	1.1		9.67259	9.30972		0.264947	0.26552	0.997841	0.393693	0.471421	0.835119
H	Saint Kitts and Nevis	0.765054	22436.5	58.9	28.3	38.4403	10.7617		40.8651	39.3321		0.0441306	0.26552	0.166204	0.0220238	0.471421	0.0467179
H	Saint Lucia	0.735487	9791.39	57.4	26.9	39.8863	10.2856		37.6411	36.229		0.113744	0.26552	0.428382	0.139194	0.471421	0.295265
H	Saint Vincent and the Grenadines	0.721578	10372.4	56.3	24.3	30.2	15.4		74.4341	71.6417		0.108904	0.26552	0.410154	0.131048	0.471421	0.277985
H	Samoa	0.703773	5371.51	74.3	43.4	19.5	9.2		68.867	66.2835		0.16415	0.26552	0.618219	0.224035	0.471421	0.475233
M	Sao Tome and Principe	0.573727	3069.85	34.8	12.3	32.2	7.6		34.4521	33.1596		0.21112	0.26552	0.79512	0.303094	0.471421	0.642937
VH	Saudi Arabia	0.846602	51320.1	69.6	34.7	48.6	10.5		31.5363	30.3532		-0.0253325	0.26552	-0.0954071	-0.0948937	0.471421	-0.201293
L	Senegal	0.493983	2250.13	30.2	9.8	57.9	5.9		14.8741	14.3161		0.237199	0.26552	0.893339	0.34699	0.471421	0.73605
H	Serbia	0.775734	12202.1	54.5	19.5	37.7	9.8		37.944	36.5205		0.0952651	0.26552	0.358787	0.108091	0.471421	0.229288
H	Seychelles	0.782418	23886.1	55.3	26.3	37.5911	11.0413		42.874	41.2656		0.0388743	0.26552	0.146408	0.0131766	0.471421	0.0279508
L	Sierra Leone	0.420312	1529.18	25.8	7.6	19.8	3		22.1164	21.2867		0.269628	0.26552	1.01547	0.401571	0.471421	0.851832
VH	Singapore	0.924866	78162.3	32.8	6.2	30.6243	13.3352		63.5611	61.1766		-0.0606524	0.26552	-0.228429	-0.154343	0.471421	-0.327399
VH	Slovakia	0.844948	26763.6	61	25.7	32.9	14		62.1141	59.7839		0.0293249	0.26552	0.110443	-0.00289661	0.471421	-0.00614443
VH	Slovenia	0.890303	28664.2	60.6	25.1	33.7	6.5		28.1541	27.0979		0.0235651	0.26552	0.0887509	-0.0125912	0.471421	-0.026709
L	Solomon Islands	0.514999	1560.86	60.2	27.7	32	4.8		21.8952	21.0738		0.267906	0.26552	1.00899	0.398673	0.471421	0.845685
M	South Africa	0.666429	12087.2	53.9	26.8	51	10.1		28.9074	27.823		0.0960595	0.26552	0.361779	0.109428	0.471421	0.232125
L	South Sudan	0.418303	1882.5	27.8	7.5	55.3988	5.17786		13.6429	13.1311		0.252176	0.26552	0.949744	0.372197	0.471421	0.789522
VH	Spain	0.884153	32778.5	60.9	23.7	22.1	7.6		50.1972	48.314		0.0123049	0.26552	0.0463426	-0.031544	0.471421	-0.0669125
H	Sri Lanka	0.766438	10788.9	25.2	6.5	55.9	11.7		30.5515	29.4053		0.105599	0.26552	0.397707	0.125485	0.471421	0.266185
L	Sudan	0.490188	3846.37	27.8	7.5	51.8832	6.33545		17.8242	17.1555		0.192188	0.26552	0.723819	0.271229	0.471421	0.575343
H	Suriname	0.724957	16018	58.5	26.1	41.7	16.9		59.1573	56.9381		0.0724211	0.26552	0.272752	0.0696412	0.471421	0.147726
L	Swaziland	0.541048	7521.82	41.4	17.7	49.1	11.9		35.3772	34.05		0.135882	0.26552	0.511759	0.176457	0.471421	0.374308
VH	Sweden	0.912706	46250.8	55.9	20.5	25	12.8		74.7357	71.932		-0.0166009	0.26552	-0.0625223	-0.0801971	0.471421	-0.170118
VH	Switzerland	0.939131	56364	54.7	19.4	21.4	16.7		113.91	109.636		-0.0332029	0.26552	-0.125049	-0.108141	0.471421	-0.229393
L	Syrian Arab Republic	0.535887	2440.6	58.5	25.3	49.6482	7.07135		20.7901	20.0102		0.230378	0.26552	0.867648	0.335508	0.471421	0.711695
M	Tajikistan	0.627472	2600.59	44.9	13.6	62.9	7.6		17.6368	16.9752		0.225047	0.26552	0.847572	0.326536	0.471421	0.692663
L	Tanzania (United Republic of)	0.530577	2466.9	25.6	7.1	45.3	4.2		13.5335	13.0258		0.229478	0.26552	0.864259	0.333993	0.471421	0.708481
H	Thailand	0.739794	14518.6	29.7	8.5	47.8	13.4		40.9199	39.3848		0.080672	0.26552	0.303826	0.0835288	0.471421	0.177185
H	The former Yugoslav Republic of Macedonia	0.748094	12405.2	55.2	19.6	35.4	12.4		51.1301	49.2119		0.0938793	0.26552	0.353568	0.105759	0.471421	0.224341
M	Timor-Leste	0.605495	5371.16	14.5	2.2	59.3	2.7		6.6461	6.39678		0.164155	0.26552	0.618239	0.224044	0.471421	0.475252
L	Togo	0.487359	1262.17	25.9	7.5	49.1	2.9		8.62133	8.29791		0.285738	0.26552	1.07614	0.428687	0.471421	0.909351
H	Tonga	0.720721	5284.39	74.8	43.3	40.6085	10.0478		36.117	34.7621		0.165522	0.26552	0.623389	0.226345	0.471421	0.480134
H	Trinidad and Tobago	0.779912	28049.1	61.4	31.1	32	21.8		99.4408	95.7103		0.0253864	0.26552	0.09561	-0.00952575	0.471421	-0.0202065
H	Tunisia	0.72456	10248.6	62.9	27.1	50.9	10.3		29.5378	28.4296		0.109913	0.26552	0.413953	0.132746	0.471421	0.281586
H	Turkey	0.766996	18704.5	66.3	29.5	45.4	8.6		27.6503	26.613		0.0594037	0.26552	0.223726	0.0477309	0.471421	0.101249
M	Turkmenistan	0.69149	14025.8	55.2	20.1	58.2	3.1		7.77493	7.48326		0.0835711	0.26552	0.314745	0.0884085	0.471421	0.187536
L	Uganda	0.492834	1670.19	21.8	4.9	22.3	4.1		26.8372	25.8304		0.262222	0.26552	0.98758	0.389107	0.471421	0.825391
H	Ukraine	0.743049	7361.01	54.2	20.1	38.5	13.9		52.7002	50.7231		0.137697	0.26552	0.518592	0.17951	0.471421	0.380785
VH	United Arab Emirates	0.839799	66203.3	74	37.2	44.4	10.9		35.8345	34.4902		-0.0467112	0.26552	-0.175923	-0.130877	0.471421	-0.277623
VH	United Kingdom	0.909491	37930.8	63.4	28.1	26.1	9.8		54.8079	52.7518		4.83691e-05	0.26552	0.000182167	-0.0521736	0.471421	-0.110673
VH	United States	0.919553	53245.1	67.3	33.7	21.2	17.1		117.738	113.321		-0.0284239	0.26552	-0.10705	-0.100097	0.471421	-0.21233
H	Uruguay	0.794786	19148.1	61.7	26.7	43.3	11.9		40.1159	38.611		0.0574362	0.26552	0.216316	0.0444193	0.471421	0.0942242
H	Uzbekistan	0.700668	5748.23	49	15.5	58.2	3.4		8.52735	8.20744		0.158459	0.26552	0.596787	0.214457	0.471421	0.454915
M	Vanuatu	0.596714	2804.68	67.9	35.4	31.6	5.5		25.4058	24.4527		0.218705	0.26552	0.823684	0.31586	0.471421	0.670016
H	Venezuela (Bolivarian Republic of)	0.766716	15128.6	62.3	24.8	38.2	13.8		52.7319	50.7537		0.0772167	0.26552	0.290813	0.0777131	0.471421	0.164849
M	Viet Nam	0.683278	5334.53	20.6	3.6	60.2	3.9		9.45641	9.10165		0.16473	0.26552	0.620403	0.225011	0.471421	0.477304
L	Yemen	0.482402	2300.27	46.8	17.2	60.3	12.1		29.2904	28.1916		0.235349	0.26552	0.886371	0.343875	0.471421	0.729445
M	Zambia	0.57907	3463.71	29.2	8.9	59.4	5.8		14.2528	13.7181		0.200986	0.26552	0.756952	0.286036	0.471421	0.606753
L	Zimbabwe	0.51564	1587.72	30.7	10.5	56.6	10		25.7894	24.8219		0.266473	0.26552	1.00359	0.396262	0.471421	0.840569
